# Supplementary material for: Basketball Teams as Strategic Networks
Source: PubMed Central journal article supplement (PMC3490980; doi:10.1371/journal.pone.0047445), 2012-11-06

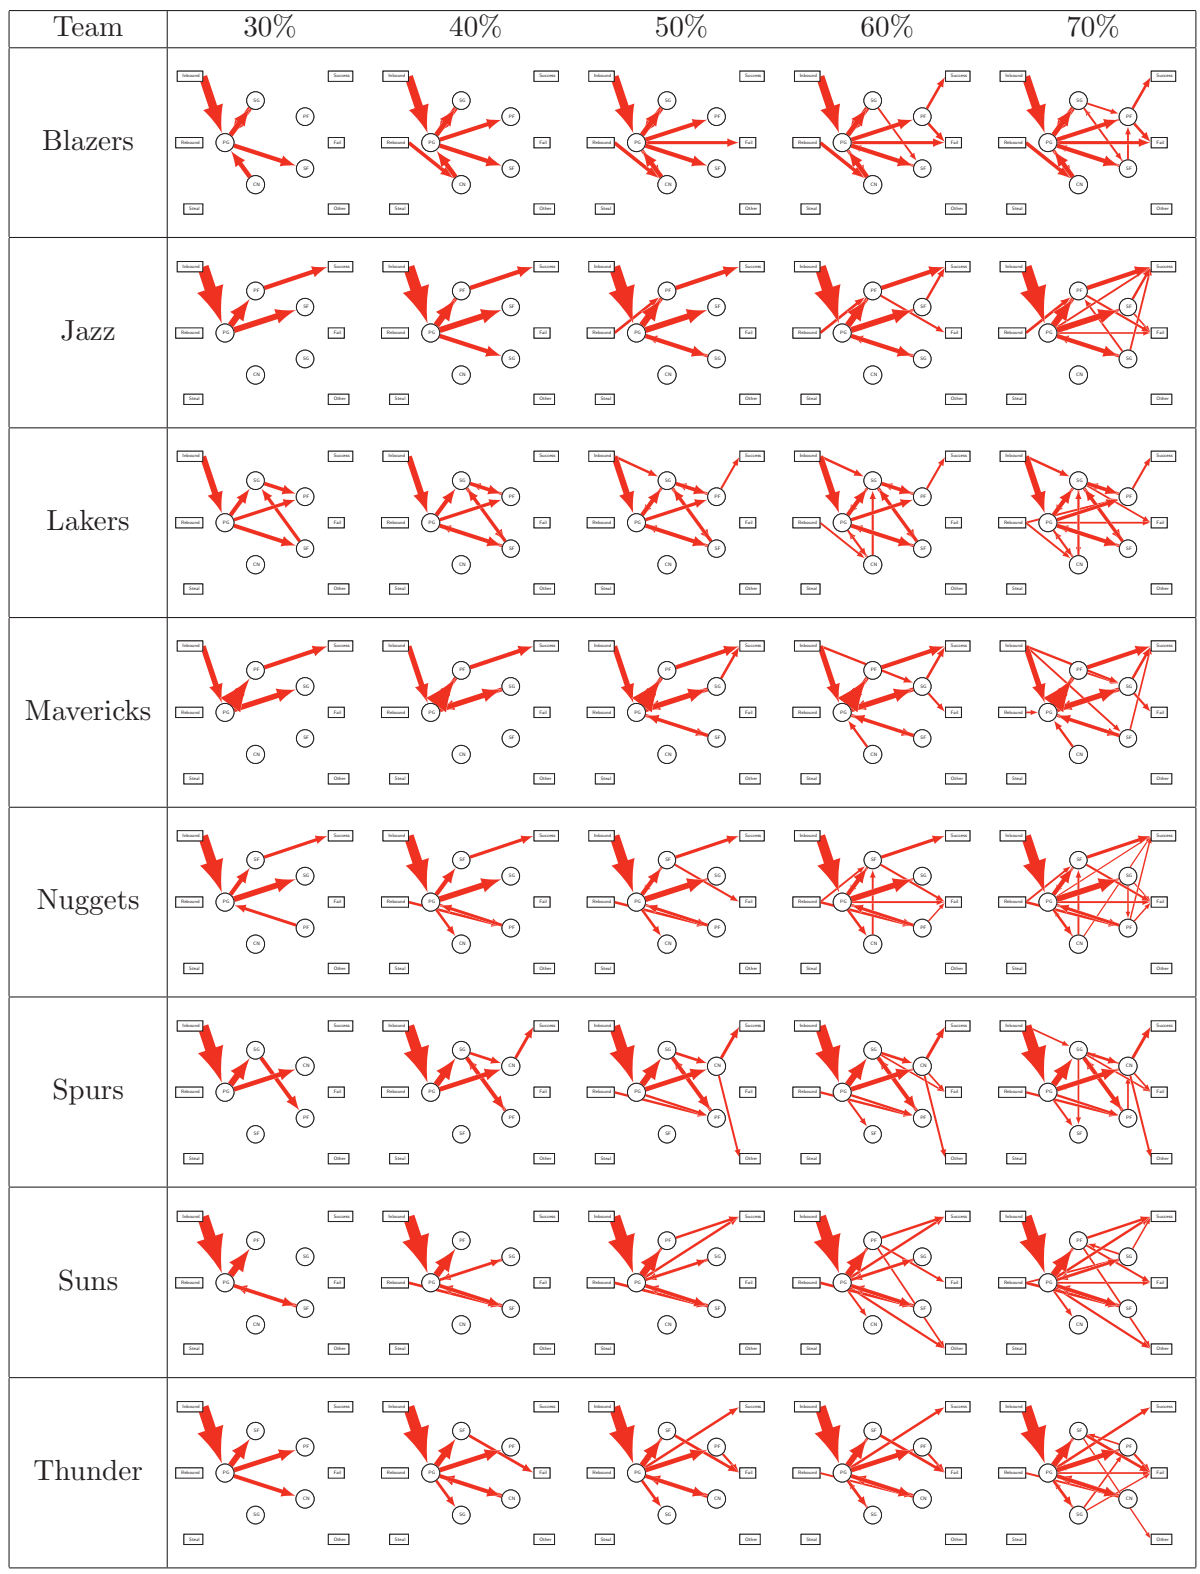

Supplement: pone.0047445.s002.pdf [file pone.0047445.s002.pdf]
