# Supplementary material for: Basketball Teams as Strategic Networks
Source: PubMed Central journal article supplement (PMC3490980; doi:10.1371/journal.pone.0047445), 2012-11-06
Supplement: pone.0047445.s003.pdf [file pone.0047445.s003.pdf]

**Table S1: Starting players and position assignments for the 2010 NBA playoffs, first round.** Substitutes are in parentheses.

| Team      | Position 1<br>Point Guard               | Position 2<br>Shooting Guard              | Position 3<br>Small Forward                | Position 4<br>Power Forward                | Position 5<br>Center                       |
|-----------|-----------------------------------------|-------------------------------------------|--------------------------------------------|--------------------------------------------|--------------------------------------------|
| Blazers   | #24 Andre Miller<br>(#4 Jarryd Bayless) | #7 Brandon Roy<br>(#5 Rudy Fernandez)     | #88 Nicolas Batum<br>(#23 Martell Webster) | #12 L. Aldridge<br>(#6 Juwan Howard)       | #21 Marcus Camby<br>(#33 D. Cunningham)    |
| Bobcats   | #20 Ray Felton<br>(#14 D.J. Augustin)   | #1 Stephen Jackson<br>(#0 Larry Hughes)   | #3 Gerald Wallace                          | #32 Boris Diaw                             | #42 Theo Ratliff<br>(#13 N. Mohammed)      |
| Bucks     | #3 B. Jennings<br>(#13 Luke Ridnour)    | #10 Carlos Delfino<br>(#24 J. Stackhouse) | #15 John Salmons                           | #12 L. Mbah a Moute<br>(#7 Ersan Ilyasova) | #40 Kurt Thomas<br>(#50 Dan Gadzuric)      |
| Bulls     | #1 Derrick Rose                         | #12 Kirk Hinrich<br>(#6 Ronald Murray)    | #9 Luol Deng<br>(#16 James Johnson)        | #52 Brad Miller<br>(#22 Taj Gibson)        | #13 Joakim Noah                            |
| Cavaliers | #2 Mo Williams<br>(#13 Delonte West)    | #18 Anthony Parker                        | #23 LeBron James                           | #4 Antawn Jamison<br>(#17 A. Varejao)      | #33 Shaquille O'Neal<br>(#11 Z. Ilgauskas) |
| Celtics   | #9 Rajon Rondo<br>(#4 Nate Robinson)    | #20 Ray Allen<br>(#42 Tony Allen)         | #34 Paul Pierce<br>(#40 Michael Finley)    | #5 Kevin Garnett<br>(#11 Glen Davis)       | #43 Kendrick Perkins                       |
| Hawks     | #10 Mike Bibby<br>(#11 J. Crawford)     | #2 Joe Johnson                            | #24 Marvin Williams<br>(#1 Maurice Evans)  | #5 Josh Smith                              | #15 Al Horford<br>(#27 Zaza Pachulia)      |
| Heat      | #8 Carlos Arroyo                        | #3 Dwyane Wade<br>(#6 Mario Chalmers)     | #5 Q. Richardson<br>(#1 Dorell Wright)     | #30 Michael Beasley<br>(#40 Udonis Haslem) | #7 Jermaine O'Neal                         |
| Jazz      | #8 Deron Williams                       | #23 W. Matthews<br>(#26 Kyle Korver)      | #34 C.J. Miles                             | #5 Carlos Boozer                           | #24 Paul Millsap<br>(#44 K. Fesenko)       |
| Lakers    | #2 Derek Fisher<br>(#1 Jordan Farmar)   | #24 Kobe Bryant                           | #37 Ron Artest                             | #16 Pau Gasol                              | #17 Andrew Bynum<br>(#7 Lamar Odom)        |
| Magic     | #14 Jameer Nelson<br>(#44 J. Williams)  | #15 Vince Carter<br>(#7 J.J. Redick)      | #22 Matt Barnes<br>(#20 Mickael Pietrus)   | #9 Rashard Lewis<br>(#33 Ryan Anderson)    | #12 Dwight Howard<br>(#13 Marcin Gortat)   |
| Mavericks | #2 Jason Kidd<br>(#11 Jose Barea)       | #4 Caron Butler<br>(#31 Jason Terry)      | #0 Shawn Marion<br>(#3 R. Beaubois)        | #41 Dirk Nowitzki                          | #25 Erick Dampier<br>(#33 B. Haywood)      |
| Nuggets   | #1 C. Billups                           | #6 Arron Afflalo<br>(#5 J.R. Smith)       | #15 Carmelo Anthony                        | #4 Kenyon Martin                           | #31 Nene Hilario<br>(#11 C. Andersen)      |
| Spurs     | #3 George Hill<br>(#9 Tony Parker)      | #20 Manu Ginobili                         | #24 Richard Jefferson                      | #34 A. McDyess<br>(#15 Matt Bonner)        | #21 Tim Duncan                             |
| Suns      | #13 Steve Nash<br>(#2 Goran Dragic)     | #23 J. Richardson                         | #33 Grant Hill<br>(#3 Jared Dudley)        | #1 A. Stoudemire<br>(#17 L. Amundson)      | #20 Jarron Collins<br>(#8 Channing Frye)   |
| Thunder   | #0 R. Westbrook<br>(#6 Eric Maynor)     | #2 Thabo Sefolosa<br>(#13 James Harden)   | #35 Kevin Durant                           | #22 Jeff Green                             | #12 Nenad Krstic<br>(#4 Nick Collison)     |
