# Supplementary material for: Basketball Teams as Strategic Networks
Source: PubMed Central journal article supplement (PMC3490980; doi:10.1371/journal.pone.0047445), 2012-11-06
Supplement: pone.0047445.s004.pdf [file pone.0047445.s004.pdf]

**Table S2: Player flow centrality.** Flow centrality (FC) is calculated as the proportion of all plays in which a player was involved. Flow centrality based on outcome is calculated as the proportion of successful (FC3 S) or failed (FC3 F) plays in which a player appears as one of the last 3 player possessions in the sequence.

| Team    | FC   |      |      |      |      | FC3 S |      |      |      |      | FC3 F |      |      |      |      |
|---------|------|------|------|------|------|-------|------|------|------|------|-------|------|------|------|------|
|         | PG   | SG   | SF   | PF   | CN   | PG    | SG   | SF   | PF   | CN   | PG    | SG   | SF   | PF   | CN   |
| Bobcats | 0.86 | 0.57 | 0.45 | 0.47 | 0.38 | 0.67  | 0.53 | 0.38 | 0.40 | 0.40 | 0.72  | 0.61 | 0.33 | 0.43 | 0.28 |
| Bucks   | 0.87 | 0.43 | 0.50 | 0.39 | 0.35 | 0.81  | 0.33 | 0.54 | 0.35 | 0.38 | 0.86  | 0.51 | 0.43 | 0.41 | 0.24 |
| Bulls   | 0.79 | 0.47 | 0.30 | 0.23 | 0.40 | 0.61  | 0.36 | 0.27 | 0.20 | 0.45 | 0.86  | 0.67 | 0.29 | 0.26 | 0.33 |
| Cavs    | 0.66 | 0.28 | 0.79 | 0.39 | 0.37 | 0.57  | 0.31 | 0.69 | 0.45 | 0.26 | 0.75  | 0.25 | 0.85 | 0.30 | 0.30 |
| Celtics | 0.82 | 0.48 | 0.44 | 0.49 | 0.36 | 0.66  | 0.43 | 0.43 | 0.54 | 0.29 | 0.65  | 0.49 | 0.30 | 0.38 | 0.30 |
| Hawks   | 0.70 | 0.57 | 0.29 | 0.37 | 0.39 | 0.63  | 0.61 | 0.16 | 0.32 | 0.29 | 0.67  | 0.60 | 0.29 | 0.42 | 0.35 |
| Heat    | 0.66 | 0.68 | 0.57 | 0.43 | 0.34 | 0.34  | 0.76 | 0.52 | 0.21 | 0.21 | 0.63  | 0.47 | 0.53 | 0.27 | 0.43 |
| Magic   | 0.84 | 0.48 | 0.32 | 0.38 | 0.37 | 0.78  | 0.33 | 0.27 | 0.33 | 0.37 | 0.73  | 0.61 | 0.29 | 0.37 | 0.22 |
| Blazers | 0.90 | 0.52 | 0.44 | 0.49 | 0.47 | 0.82  | 0.39 | 0.42 | 0.39 | 0.42 | 0.83  | 0.51 | 0.34 | 0.51 | 0.23 |
| Jazz    | 0.91 | 0.36 | 0.43 | 0.52 | 0.12 | 0.82  | 0.36 | 0.43 | 0.55 | 0.11 | 0.86  | 0.32 | 0.50 | 0.50 | 0.14 |
| Lakers  | 0.70 | 0.72 | 0.56 | 0.53 | 0.47 | 0.40  | 0.55 | 0.35 | 0.53 | 0.48 | 0.60  | 0.64 | 0.56 | 0.40 | 0.24 |
| Mavs    | 0.83 | 0.51 | 0.40 | 0.60 | 0.23 | 0.77  | 0.48 | 0.36 | 0.68 | 0.14 | 0.74  | 0.55 | 0.32 | 0.45 | 0.23 |
| Nuggets | 0.74 | 0.41 | 0.50 | 0.43 | 0.35 | 0.73  | 0.36 | 0.50 | 0.30 | 0.39 | 0.74  | 0.34 | 0.47 | 0.47 | 0.29 |
| Spurs   | 0.79 | 0.65 | 0.30 | 0.44 | 0.48 | 0.70  | 0.48 | 0.35 | 0.30 | 0.57 | 0.67  | 0.48 | 0.19 | 0.52 | 0.33 |
| Suns    | 0.82 | 0.38 | 0.39 | 0.49 | 0.23 | 0.69  | 0.36 | 0.33 | 0.54 | 0.10 | 0.72  | 0.47 | 0.28 | 0.42 | 0.31 |
| Thunder | 0.90 | 0.33 | 0.49 | 0.38 | 0.39 | 0.77  | 0.15 | 0.35 | 0.23 | 0.42 | 0.86  | 0.31 | 0.42 | 0.50 | 0.28 |
